# Supplementary material for: Silicon nanowire–Ta2O5–NGQD heterostructure: an efficient photocathode for photoelectrochemical hydrogen evolution
Source: Royal Society of Chemistry journal article supplement (doi:10.1039/d1se01280k), 2021-11-18
Supplement: d1se01280k1.pdf [file d1se01280k1.pdf]

## Electronic Supplementary Information (ESI)

### Silicon Nanowire-Ta<sub>2</sub>O<sub>5</sub>-NGQD heterostructure: An efficient photocathode for Photoelectrochemical hydrogen evolution

Sk Riyajuddin<sup>1</sup>, Jenifar Sultana<sup>1</sup>, Shumile Ahmed Siddiqui<sup>1</sup>, Sushil Kumar<sup>1</sup>, Damini Badhwar<sup>1</sup>, Shyam Sundar Yadav<sup>2</sup>, Saveena Goyal<sup>1</sup>, Ananth Venkatesan<sup>2</sup>, Suvankar Chakraverty<sup>1</sup> and Kaushik Ghosh<sup>1\*</sup>

<sup>1</sup>Institute of Nano Science & Technology, Knowledge City, Sector-81, SAS Nagar, Mohali, 140306, Punjab, India

<sup>2</sup>Indian Institute of Science Education and Research, Knowledge City, Sector-81, SAS Nagar, Mohali, 140306, Punjab, India

\*Corresponding Author email: [kaushik@inst.ac.in](mailto:kaushik@inst.ac.in)

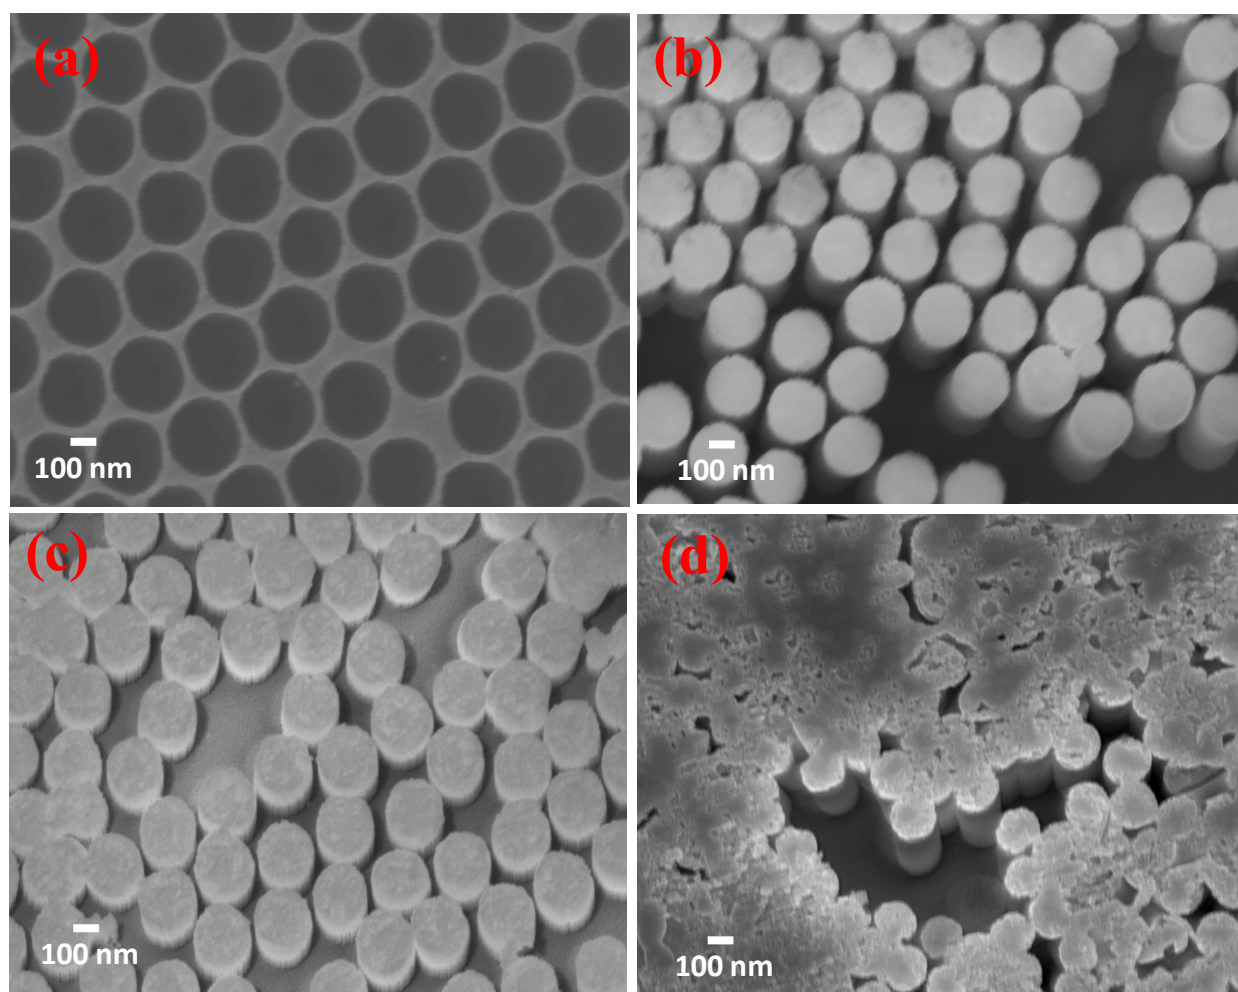

**Figure S1.** FE-SEM image of (a) hexagonal honeycomb-like gold mesh arrays after removal of PS beads on planar p-Si surface; p-SiNWs-Ta<sub>2</sub>O<sub>5</sub> heterostructure with different thickness of Ta<sub>2</sub>O<sub>5</sub> (b) 15 nm; (c) 40 nm; (d) 80 nm.

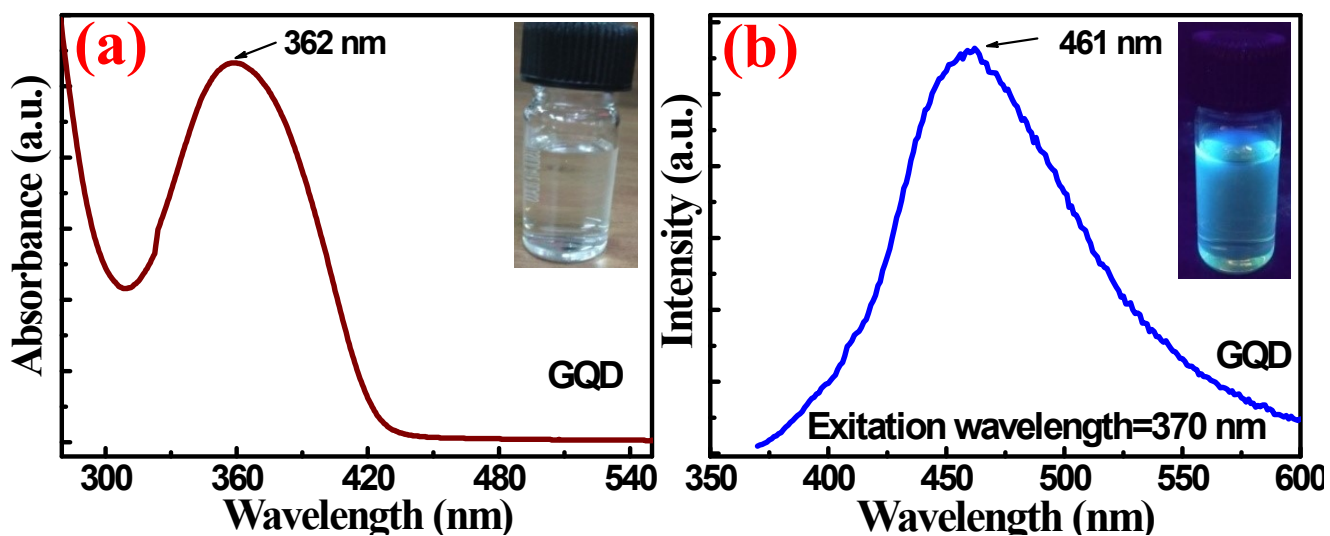

Figure S2. (a) Absorbance spectra and inset shows the solution colour under sunlight; (b) PL Spectra of GQD at an excitation wavelength of 370 nm and inset shows the solution colour under UV irradiation.

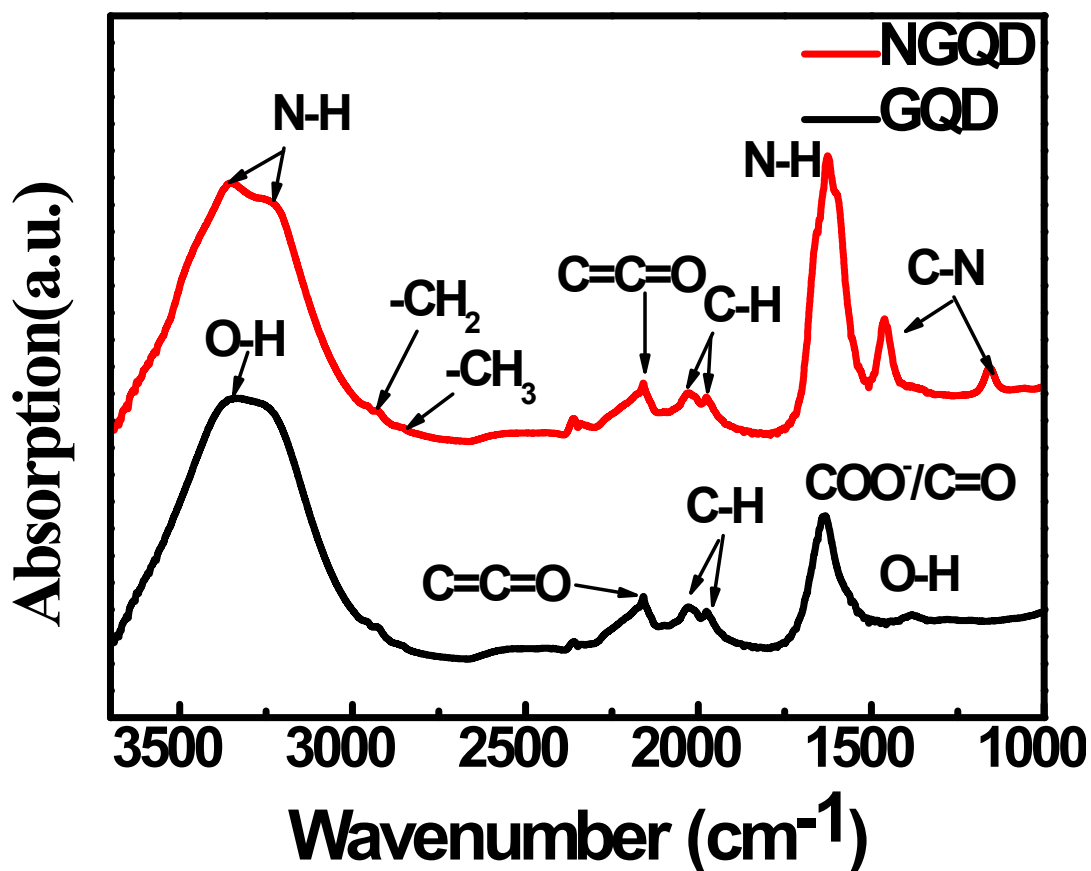

**Figure S3.** ATR-FTIR absorption spectrum corresponding to both GQD and NGQD. In GQD, the bands at 3329 and 1387  $\text{cm}^{-1}$  corresponds to the vibration mode of O-H functional group. The absorption bands at 2925, 2856, 2159 and 2034  $\text{cm}^{-1}$  indicate the stretching vibration mode of  $-\text{CH}_2$ ,  $-\text{CH}_3$ ,  $\text{C}=\text{C}=\text{O}$  and  $\text{C}=\text{O}$  bonds in both GQD and NGQD. Additionally, in NGQD, the newly formed bands at 3260~3132, 1625  $\text{cm}^{-1}$  and; 1452, 1150  $\text{cm}^{-1}$  corresponds to the bond formation of N-H and;  $\text{C}=\text{N}$ ,  $\text{C}-\text{N}$  bonds, respectively.

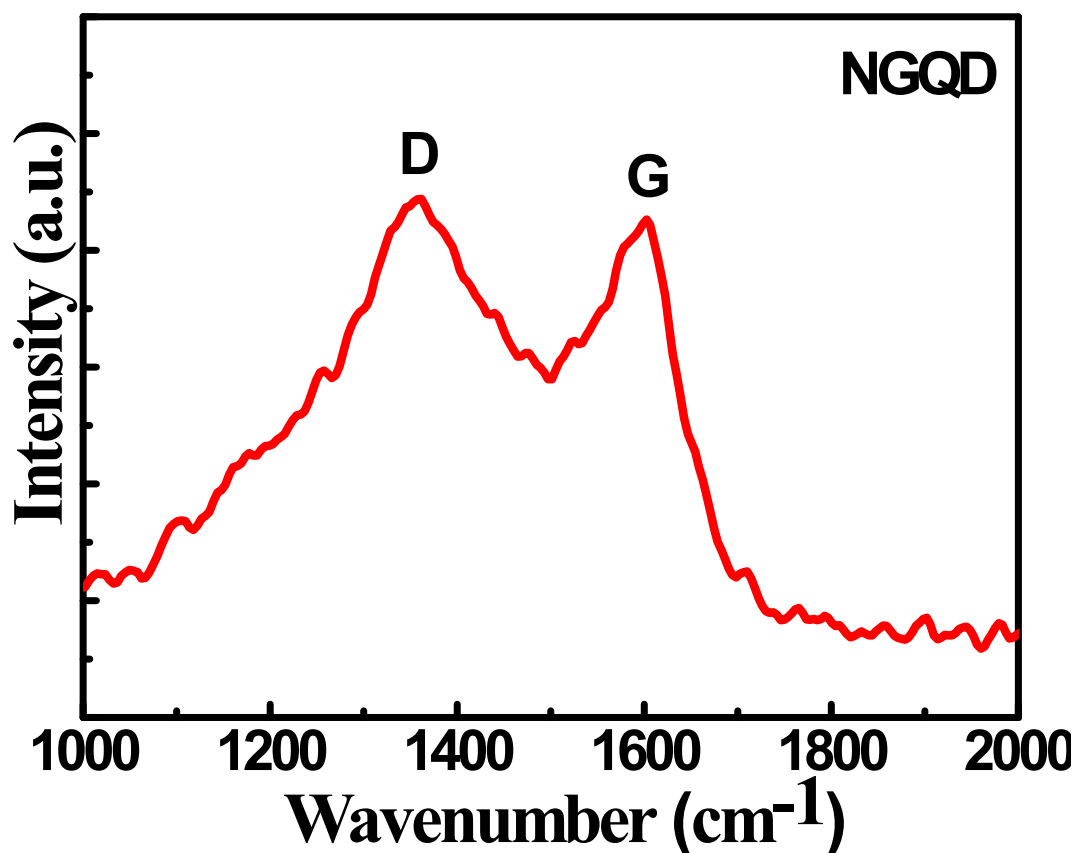

**Figure S4.** (a) Raman spectra of NGQD. The peaks centered at  $\sim 1365$  and  $1600 \text{ cm}^{-1}$  corresponding to the D and G bands, which are attributed to the in-plane  $\text{A}_{1\text{g}}$  and  $\text{E}_{2\text{g}}$  mode of vibrations, respectively.

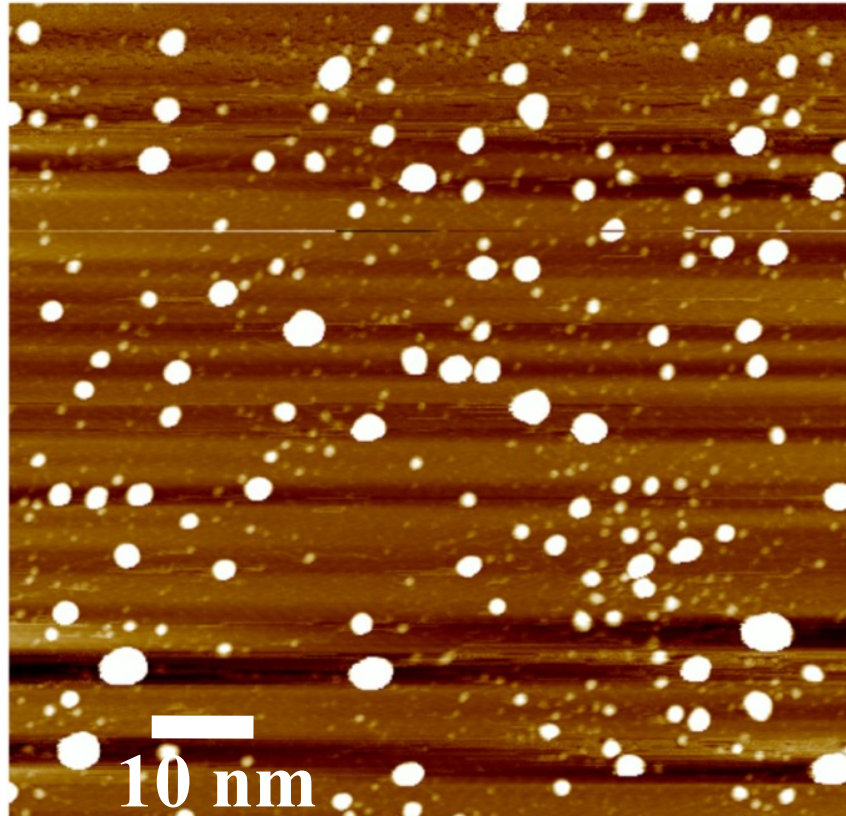

**Figure S5.** AFM image of as-prepared NGQD and the diameter is found to be in the range of 3-4 nm.

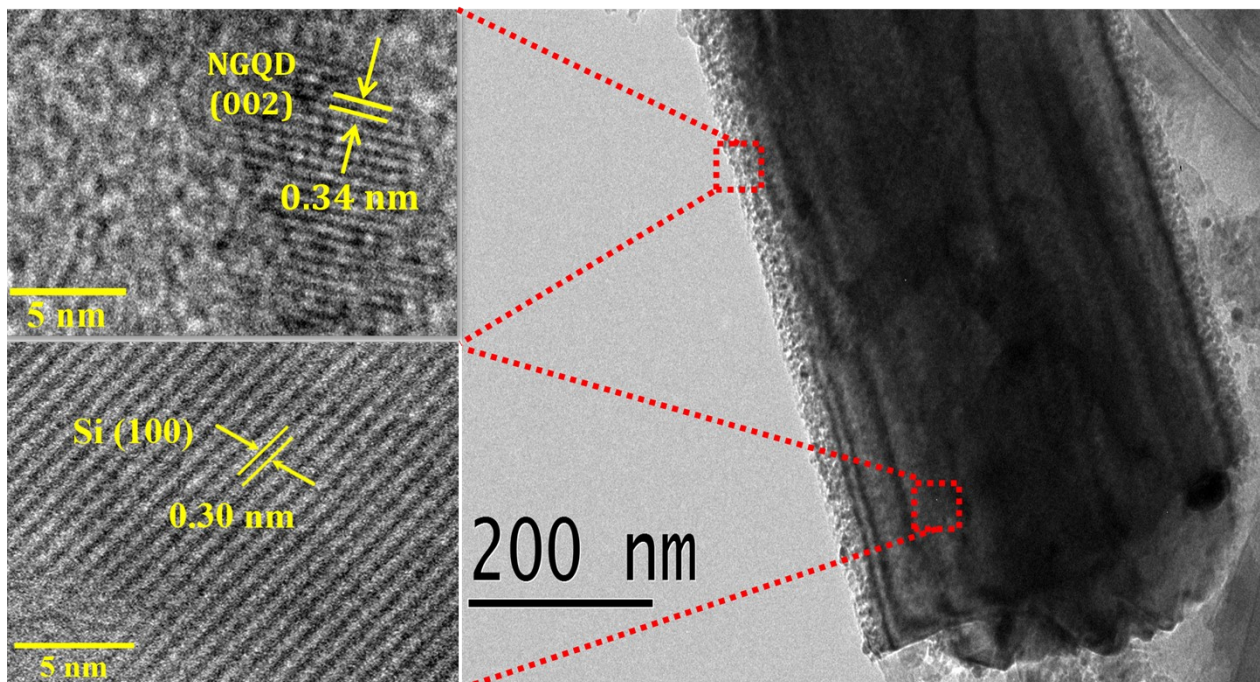

**Figure S6.** TEM image of p-SiNWs decorated with NGQD layer on its surface. HR-TEM images depicting the lattice fringes corresponding to both SiNWs ((100),  $d \sim 0.30$  nm) and NGQD ((002),  $d \sim 0.34$  nm), respectively.

**Table S1.** Calculated lattice spacing corresponding to Ta<sub>2</sub>O<sub>5</sub> and Si from SAED pattern, where r represents the radius of the ring.

| Label                                | 1/2r (1/nm) | 1/r (1/nm) | r (nm)   |
|--------------------------------------|-------------|------------|----------|
| Si (100)                             | 6.311       | 3.312      | 0.301907 |
| Ta <sub>2</sub> O <sub>5</sub> (111) | 8.683       | 4.341      | 0.230335 |
| Si (222)                             | 12.612      | 6.306      | 0.158579 |
| Si (331)                             | 16.428      | 8.214      | 0.121743 |
| Si (220)                             | 19.548      | 9.774      | 0.102312 |

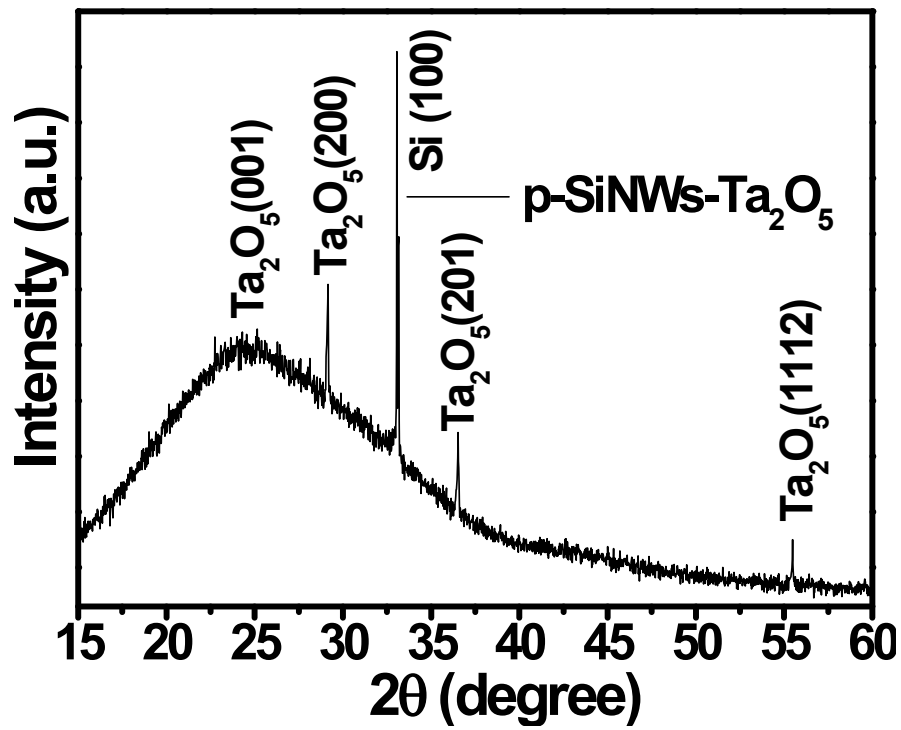

**Figure S7.** XRD analysis of p-SiNWs-Ta<sub>2</sub>O<sub>5</sub> sample in where the diffraction peak at 23.81, 29.16, 36.52, 55.52° corresponds to the lattice plans of (001), (200), (201) and (1112), respectively for Ta<sub>2</sub>O<sub>5</sub> and 33.09° correspond to (100) plan of Si.

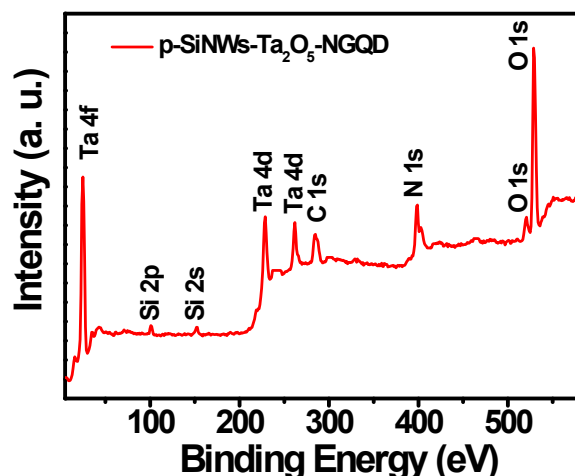

**Figure S8.** XPS Survey scan of p-SiNWs-Ta<sub>2</sub>O<sub>5</sub>-NGQD. The presence of all the elements (Si, Ta, O, N, C) confirms the formation of the heterostructure.

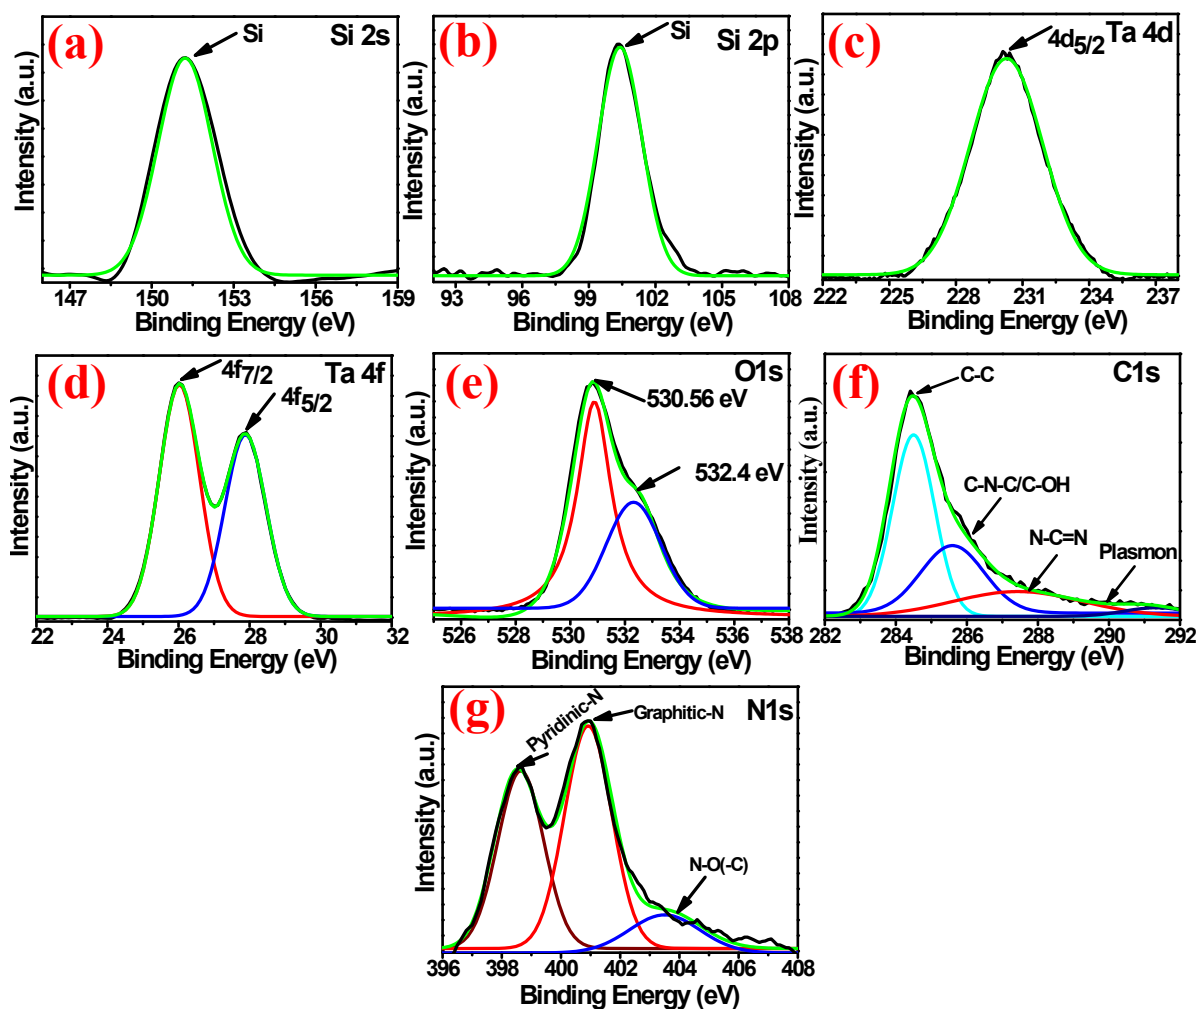

**Figure S9.** High-resolution XPS spectra of (a) Si 2s (b) Si 2p (c) Ta 4d (d) Ta 4f (e) O 1s (f) C 1s (g) N 1s of the prepared p-SiNWs-Ta<sub>2</sub>O<sub>5</sub>-NGQD heterostructure.

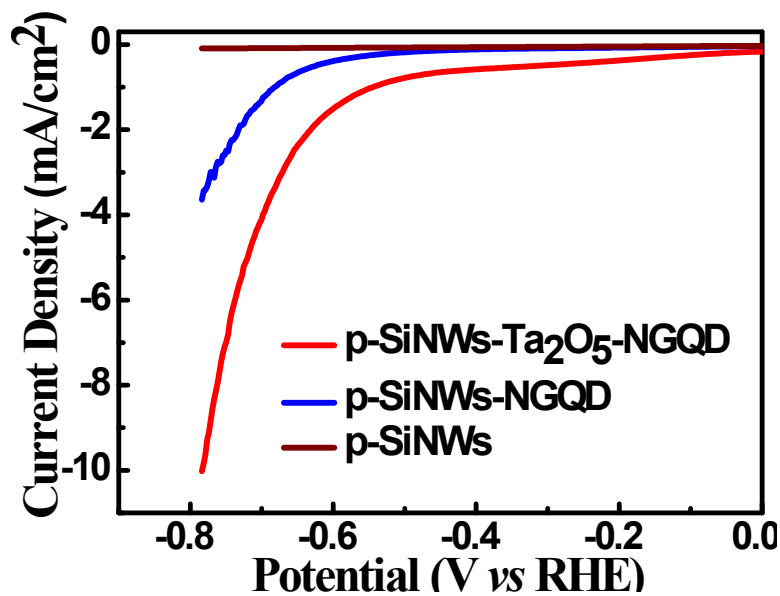

**Figure S10.** LSV polarization curve (without  $iR$  correction) for p-SiNWs, p-SiNWs-NGQD and p-SiNWs-Ta<sub>2</sub>O<sub>5</sub>-NGQD in 1 M HClO<sub>4</sub> solution in dark condition.

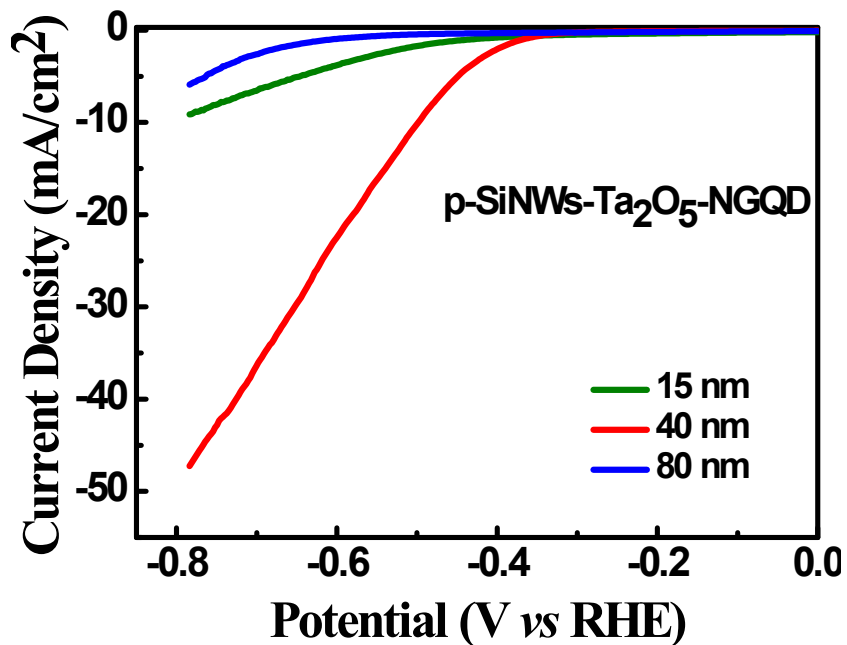

**Figure S11.** LSV polarization curve (without  $iR$  correction) for p-SiNWs-Ta<sub>2</sub>O<sub>5</sub>-NGQD in 1 M HClO<sub>4</sub> solution for different Ta<sub>2</sub>O<sub>5</sub> thickness under illuminated condition.

**Table S2.** Comparison of PEC-HER performance in terms of overpotential, photocurrent density and ABPE of all as-grown samples in 1 M HClO<sub>4</sub> solution under illuminated and dark conditions, respectively.

| Condition          | Working Electrode                            | Over-potential (mV)@5 mA/cm <sup>2</sup> | Over-potential (mV)@10 mA/cm <sup>2</sup> | Current density(mA/cm <sup>2</sup> ) @ -0.78 V (vs RHE) | ABPE (%) |
|--------------------|----------------------------------------------|------------------------------------------|-------------------------------------------|---------------------------------------------------------|----------|
| Under illumination | p-SiNWs                                      | -                                        | -                                         | -0.1                                                    | -        |
|                    | p-SiNWs-NGQD                                 | -745                                     | -                                         | -8.5                                                    | 3.5      |
|                    | p-SiNWs-Ta <sub>2</sub> O <sub>5</sub> -NGQD | -449                                     | -498                                      | -49.5                                                   | 21.1     |
| Under dark         | p-SiNWs                                      | -                                        | -                                         | -0.09                                                   | -        |
|                    | p-SiNWs-NGQD                                 | -                                        | -                                         | -3.64                                                   | -        |
|                    | p-SiNWs-Ta <sub>2</sub> O <sub>5</sub> -NGQD | -720                                     | -775                                      | -10.05                                                  | -        |

### Hydrogen evolution reaction (HER) mechanism in acid medium:

There are two different reaction mechanisms comprising of three steps for hydrogen evolution reaction (HER) under acidic medium. One is Volmer-Heyrovsky and the other is Volmer-Tafel, where the primary discharge step (Volmer step) is common in both the mechanism. The three steps for hydrogen evolution under acidic medium are as listed below.<sup>1</sup>

#### Step 1: Volmer reaction (Discharge step)

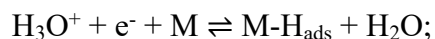



In this step, the electrons move towards the cathode surface and concurrently there is a formation of  $M\text{-H}_{\text{ads}}$  intermediate state by the hydronium ions ( $\text{H}_3\text{O}^+$ ) coming from the electrolyte side (where  $M$  is the active surface of the metal). Here, Tafel slope  $b \sim 120$  mV.

### Step 2: Heyrovsky reaction (desorption step)

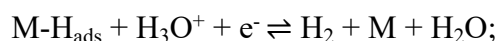

In this step, the  $\text{H}_{\text{ads}}$  intermediates combine with a electron and hydronium ion and produce  $\text{H}_2$  molecule, while the density of  $\text{H}_{\text{ads}}$  on the surface of the metal is very less and Tafel slope,  $b \sim 40$  mV under such condition.

### Step 3: Tafel reaction (Recombination Step)

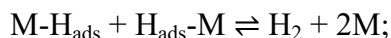

This step occurs when there is a high density of  $\text{H}_{\text{ads}}$  on the metal surface, leading to the recombination of the two nearby  $\text{H}_{\text{ads}}$  intermediates together to form a  $\text{H}_2$  molecule. Under such condition, Tafel slope  $b \sim 30$  mV.

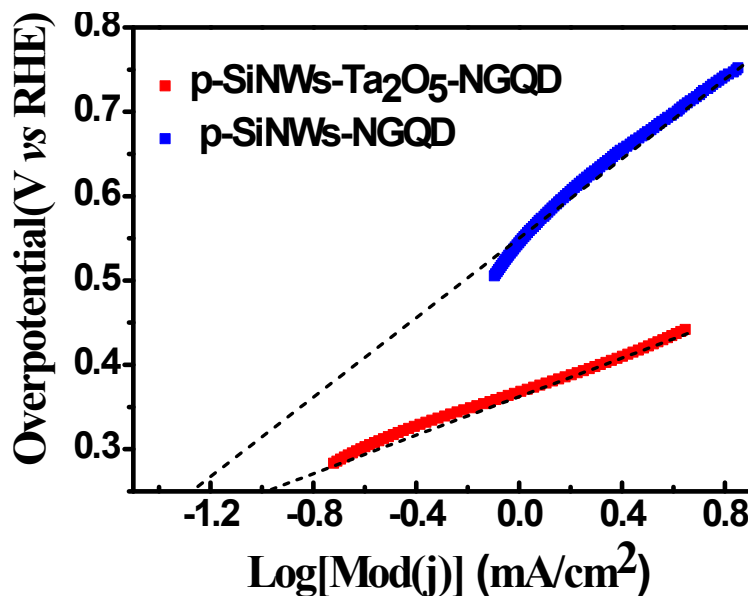

**Figure S12.** Calculated exchange current density of p-SiNWs-Ta<sub>2</sub>O<sub>5</sub>-NGQD and p-SiNWs-NGQD *via* extrapolating the Tafel plots to the X-axis under illumination

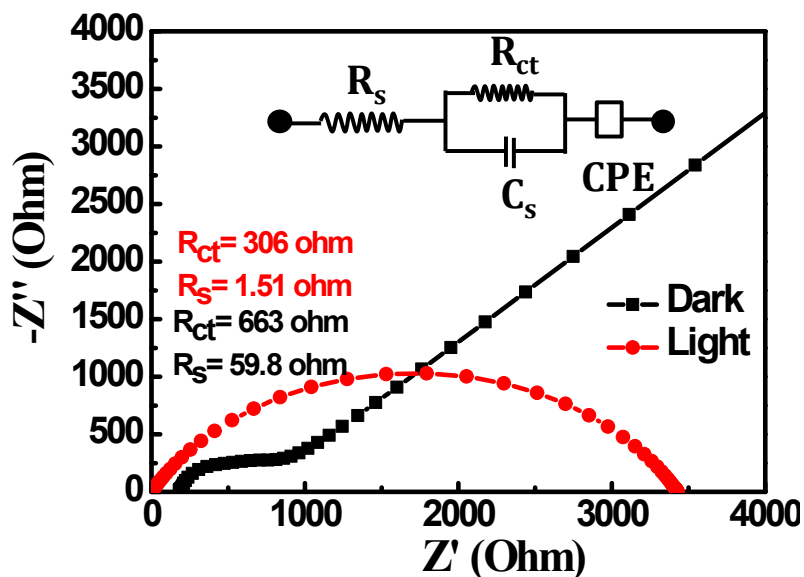

**Figure S13.** Nyquist plots of p-SiNWs-Ta<sub>2</sub>O<sub>5</sub>-NGQD in light and dark conditions in 1 M HClO<sub>4</sub> solution. Inset shows the fitted circuit diagram of the above Nyquist plots.

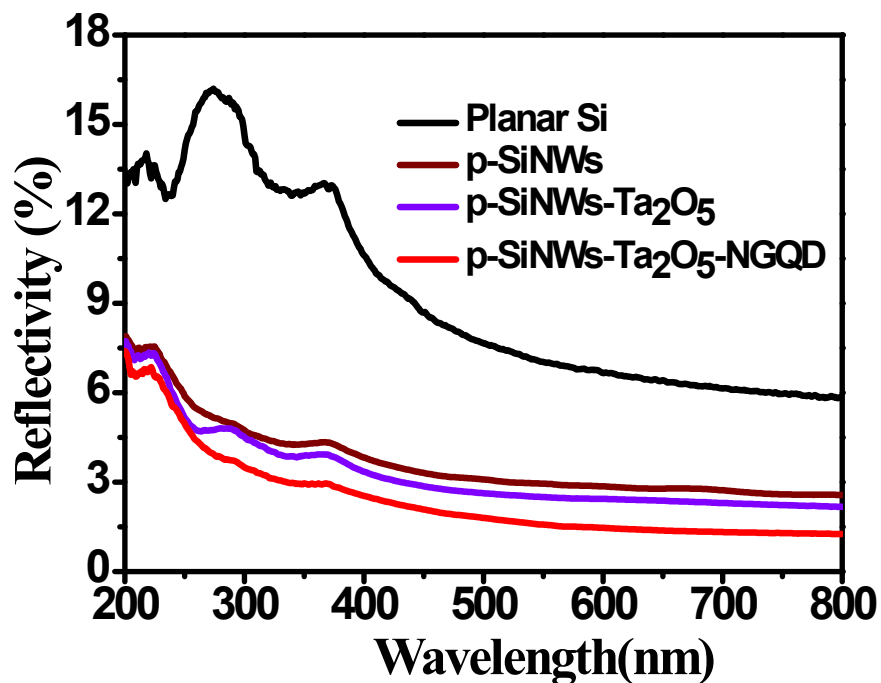

**Figure S14.** DRS UV-Vis spectra analysis of Planar Si, p-SiNWs, p-SiNWs-Ta<sub>2</sub>O<sub>5</sub> and the p-SiNWs-Ta<sub>2</sub>O<sub>5</sub>-NGQD hetero-structure. The result shows the reflectivity decreases with the decoration of Ta<sub>2</sub>O<sub>5</sub> and NGQD on top of the p-SiNWs as compared to planar Si substrate.

**Table S3.** The PEC-HER performance of the as-prepared p-SiNWs-Ta<sub>2</sub>O<sub>5</sub>-NGQD heterostructure in comparison with the recently reported Metal and Metal-Free Si-based photocathodes.

| S. No | Material                                                                                                                                                 | Electrolyte                                                                    | Photo current (mA/cm <sup>2</sup> ) | ABPE (%)             | Over Potential (mV)@10 mA/cm <sup>2</sup> | Ref. |
|-------|----------------------------------------------------------------------------------------------------------------------------------------------------------|--------------------------------------------------------------------------------|-------------------------------------|----------------------|-------------------------------------------|------|
| 1.    | SiNW/Ni-B<br>SiNW/Co-B                                                                                                                                   | 2M PBS                                                                         | -15.6<br>-19.5                      | 2.45<br>2.53         | -54<br>-                                  | 2    |
| 2.    | n <sup>+</sup> p Si microwire /Ni-Mo<br>n <sup>+</sup> p Si microwire/Pt                                                                                 | KHP Buffer<br>(pH=4)                                                           | -9.1<br>-13.2                       | 1.9(STH)<br>2.7(STH) | -                                         | 3    |
| 3.    | p-i-n Si/ Pt/Co <sub>3</sub> O <sub>4</sub><br>n-i-p Si/ Pt/Co <sub>3</sub> O <sub>4</sub>                                                               | 1M KOH<br>1M KOH                                                               | -12.03<br>-7.3                      | 3.3<br>0.93          | -                                         | 4    |
| 4.    | Si-SrTiO <sub>3</sub> (Ti/Pt catalyst)                                                                                                                   | 0.5M H <sub>2</sub> SO <sub>4</sub>                                            | -35                                 | 4.9                  | -                                         | 5    |
| 5.    | pn <sup>+</sup> -Si/Ta <sub>2</sub> O <sub>5</sub> /Pt                                                                                                   | 1 M HClO <sub>4</sub>                                                          | -34.7                               | 8.1                  | -                                         | 6    |
| 6.    | Si/TaO <sub>x</sub>                                                                                                                                      | 1 M HCl                                                                        | -37.1                               | 7.7                  | -                                         | 7    |
| 7.    | SiNWs – MoS <sub>2</sub>                                                                                                                                 | 0.5 M H <sub>2</sub> SO <sub>4</sub>                                           | -26.5                               | 1.05                 |                                           | 8    |
| 8.    | n <sup>+</sup> p-Si/MoSe <sub>2</sub>                                                                                                                    | 1 M HClO <sub>4</sub>                                                          | -29.3                               | 3.8%                 | -195                                      | 9    |
| 9.    | Si/MoS <sub>2</sub> Cl                                                                                                                                   | 0.5MH <sub>2</sub> SO <sub>4</sub>                                             | -20.6                               | -                    | -160                                      | 10   |
| 10.   | ZnO/a-Si/TiO <sub>2</sub>                                                                                                                                | 0.5 M aqueous<br>KHP                                                           | -11.6                               | 5.5                  | -                                         | 11   |
| 11.   | Si/TiO <sub>2</sub> /MoS <sub>2</sub>                                                                                                                    | 0.5 M H <sub>2</sub> SO <sub>4</sub>                                           | -0.24                               | -                    | -                                         | 12   |
| 12.   | n <sup>+</sup> p SiNWs/Pt                                                                                                                                | 0.5 M K <sub>2</sub> SO <sub>4</sub>                                           | -15                                 | 6.6                  | -                                         | 13   |
| 13.   | Si /Al <sub>2</sub> O <sub>3</sub> (Pt catalyst)                                                                                                         | 0.5M H <sub>2</sub> SO <sub>4</sub>                                            | -26.2                               | -                    | -                                         | 14   |
| 14.   | p-Si/SiO <sub>2</sub> /Ti/Pt                                                                                                                             | 0.5 M H <sub>2</sub> SO <sub>4</sub>                                           | -22                                 | 2.9%                 | -                                         | 15   |
| 15.   | n <sup>+</sup> p-Si /TiO <sub>2</sub> /Pt                                                                                                                | 1M HClO <sub>4</sub>                                                           | -34.8                               | STH – 10.8           | -                                         | 16   |
| 16.   | n <sup>+</sup> p-Si/Mo/MoS <sub>2</sub> /Pt<br>n <sup>+</sup> pSi/Mo/MoS <sub>2</sub> /MoS <sub>x</sub> /Pt<br>n <sup>+</sup> p-Si/W/WS <sub>2</sub> /Pt | 1 M HClO <sub>4</sub>                                                          | -10.9<br>-12<br>-9                  | -<br>-<br>-          | -                                         | 17   |
| 17.   | n <sup>+</sup> p-Si/Co-S                                                                                                                                 | 0.5M H <sub>2</sub> SO <sub>4</sub>                                            | -11                                 | -                    | -85                                       | 18   |
| 18.   | p-Si NW/Pt                                                                                                                                               | H <sub>2</sub> SO <sub>4</sub> + 0.5M<br>K <sub>2</sub> SO <sub>4</sub> (pH=1) | -20                                 | -                    | -                                         | 19   |
| 19.   | p-SiNWs/TiO <sub>2</sub> /Pt                                                                                                                             | 0.5M H <sub>2</sub> SO <sub>4</sub>                                            | -30                                 | -                    | -                                         | 20   |
| 20.   | p-SiNWs/MoS <sub>2</sub>                                                                                                                                 | 1M Na <sub>2</sub> SO <sub>4</sub>                                             | -1                                  | STH-<br>0.03%        | -                                         | 21   |
| 21.   | n-type SiNWs/Bi <sub>2</sub> O <sub>3</sub>                                                                                                              | 1 M NaOH                                                                       | -1.28                               | 0.47                 | -                                         | 22   |
| 22.   | SiNWs/CdSe QD                                                                                                                                            | 0.25M Na <sub>2</sub> S +<br>0.35M Na <sub>2</sub> SO <sub>3</sub>             | -6.1                                | -                    | -                                         | 23   |
| 23.   | Si/PEDOT hybrid                                                                                                                                          | 1M KOH                                                                         | -2.5                                | -                    | -                                         | 24   |

|     |                                                                                                                                        |                                                                             |                         |                           |      |    |
|-----|----------------------------------------------------------------------------------------------------------------------------------------|-----------------------------------------------------------------------------|-------------------------|---------------------------|------|----|
|     | core/shell NW array                                                                                                                    |                                                                             |                         |                           |      |    |
| 24. | SiNW/ Fe <sub>2</sub> S <sub>2</sub> (CO) <sub>6</sub>                                                                                 | 0.1M H <sub>2</sub> SO <sub>4</sub>                                         | -17                     | -                         | -    | 25 |
| 25. | Vertically aligned SiNWs (n-type)                                                                                                      | 200 mM Me <sub>2</sub> FeB <sub>4</sub> + 1M LiClO <sub>4</sub> in Ethanol. | 4.19                    | -                         | -    | 26 |
| 26. | Si MWs/MoO <sub>x</sub> S <sub>y</sub> -10<br>Si MWs/MoO <sub>x</sub> S <sub>y</sub> -30<br>Si MWs/MoO <sub>x</sub> S <sub>y</sub> -50 | 0.5M K <sub>2</sub> SO <sub>4</sub> + H <sub>2</sub> SO <sub>4</sub>        | -1.28<br>-7.35<br>-9.83 | STH- 0.05<br>0.63<br>0.82 | -100 | 27 |
| 27. | Si MWs/CoSe <sub>2</sub>                                                                                                               | 0.5 M Na <sub>2</sub> SO <sub>4</sub> / H <sub>2</sub> SO <sub>4</sub>      | -9                      | STH- 0.93                 | -320 | 28 |
| 28. | Si NWs/Ni <sub>12</sub> P <sub>5</sub><br>Si NWs/Ni <sub>2</sub> P                                                                     | 0.5 M H <sub>2</sub> SO <sub>4</sub>                                        | -21<br>-22.6            | STH- 2.97<br>STH- 3.13    | -143 | 29 |
| 29. | Si NWs/Co-P                                                                                                                            | 0.5M K <sub>2</sub> SO <sub>4</sub> /H <sub>2</sub> SO <sub>4</sub>         | -15.6                   | STH- 2.86                 | -    | 30 |
| 30. | Si NWs/FeP                                                                                                                             | 0.5M K <sub>2</sub> SO <sub>4</sub> /0.05M H <sub>2</sub> SO <sub>4</sub>   | -13.9                   | STH- 2.64                 | -    | 31 |
| 31. | Si MWs/CoS <sub>2</sub><br>Si MWs/CoSe <sub>2</sub>                                                                                    | 0.5M H <sub>2</sub> SO <sub>4</sub><br>1.0 M PBS                            | -3.22<br>-2.55          | -<br>-                    | -    | 32 |
| 32. | Si wires/WS <sub>3</sub><br>Si wires/WS <sub>2</sub>                                                                                   | 0.5M K <sub>2</sub> SO <sub>4</sub> /0.05M H <sub>2</sub> SO <sub>4</sub>   | -19<br>-7               | STH- 2.02<br>STH- 0.187   | -670 | 33 |
| 33. | a-Si /Mo <sub>2</sub> C                                                                                                                | 0.1 M H <sub>2</sub> SO <sub>4</sub><br>1 M KOH                             | -11.2<br>-11.4          | -<br>-                    | -    | 34 |
| 34. | Pyramidal p-SiNWs-Co <sub>2</sub> P                                                                                                    | 0.5 M H <sub>2</sub> SO <sub>4</sub>                                        | -35.2                   | -                         | -    | 35 |

### Metal Free Si based PEC-HER

|    |                                                 |                                      |              |             |             |                  |
|----|-------------------------------------------------|--------------------------------------|--------------|-------------|-------------|------------------|
| 1. | Graphene/Si                                     | 1M HClO <sub>4</sub>                 | -31.1        | 0.32        |             | 36               |
| 2. | SiNW@N-doped GQS                                | 1M HClO <sub>4</sub>                 | -35          | 2.29        | -           | 37               |
| 3. | N-doped monolayer Graphene/ Silicon             | 1M HClO <sub>4</sub>                 | -5.5         | STH-3.05    | -           | 38               |
| 4. | rGO-SiNWs                                       | 1M HClO <sub>4</sub>                 | -23.152      | STH- 3.16   | -           | 39               |
| 5. | Chl/CQDs-SiNWs                                  | 0.5M H <sub>2</sub> SO <sub>4</sub>  | -26.36       | 7.86        | -           | 40               |
| 6. | p-i-n SiNWs/NGQD                                | 0.5 M H <sub>2</sub> SO <sub>4</sub> | -26.2        | 16.4        | -460        | 41               |
| 7. | <b>p-SiNWs-Ta<sub>2</sub>O<sub>5</sub>-NGQD</b> | <b>1M HClO<sub>4</sub></b>           | <b>-49.5</b> | <b>21.1</b> | <b>-498</b> | <b>This Work</b> |

#ABPE- Applied Bias Photon-to-Current Efficiency

#STH- Solar to Hydrogen Conversion Efficiency

**Mott-Schottky analysis:**

The dependence of the inverse square capacitance of the space-charge region under reverse-bias in the semiconductor is given by the Mott-Schottky relation:<sup>42</sup>

$$\frac{1}{C_{sc}^2} = \frac{2}{\epsilon_0 \epsilon_{Si} q N_d} \left( V - E_{fb} - \frac{kT}{q} \right) \dots\dots\dots (1)$$

where  $\epsilon_{Si}$ : Relative permittivity of Si (11.7),  $\epsilon = \epsilon_{Si} \epsilon_0$

$\epsilon_0 = 8.85 \times 10^{-14}$  F/cm

q: Elementary charge ( $1.6 \times 10^{-19}$  C),

$N_d$ : Donor concentration in the semiconductor,

V: potential difference between the semiconductor and the redox potential of the solution.

$E_{fb}$ : Flat band potential,

K: Boltzmann's constant ( $1.38 \times 10^{-27}$  cm<sup>2</sup> kg s<sup>-2</sup> K<sup>-1</sup>)

T: Temperature (298 K).

The  $E_{fb}$  is determined by taking the value of the X-axis intercept of the extrapolated linear region of the  $(C^{SC})^{-2}$  in the Mott-Schottky plot.

The barrier height  $\phi_b$  is calculated using the Schottky's relation:

$$\phi_b = E_{fb} + V_n \dots\dots\dots (2)$$

Where  $V_n$  is the difference between the potential of the conduction band edge and the Fermi level, and is obtained by using the following relationship

$$V_n = \frac{kT}{q} \left( \ln \frac{N_c}{N_d} \right) \dots\dots\dots (3)$$

The density of conduction band states ( $N_c$ ) is calculated by:

$$N_c = 2 \left( \frac{2\pi m_e^* kT}{h^2} \right)^{3/2} \dots\dots\dots(4)$$

where  $m_e^*$  : Effective mass of electron in Si ( $m_e^* \sim 9.84 \times 10^{-31} \text{kg}$ )

h: Planck's constant ( $6.63 \times 10^{-34} \text{ Js}$ ).

Using the slope (slope  $= \frac{2}{q\epsilon N_D}$ ) of Mott-Schottky plot and the above equations, the  $N_d$  and  $V_n$  the are calculated.

**Table S4.** Calculated values of carrier concentration, flat band potential, barrier height of p-SiNWs, p-SiNWs-NGQD and p-SiNWs- Ta<sub>2</sub>O<sub>5</sub> and p-SiNWs- Ta<sub>2</sub>O<sub>5</sub>-NGQD photocathodes from the Mott-Schottky analysis.

| <b>Working electrode</b>                        | <b>N<sub>c</sub>(cm<sup>-3</sup>)</b> | <b>N<sub>d</sub>(cm<sup>-3</sup>)</b> | <b>E<sub>fb</sub>(V)</b> | <b>V<sub>n</sub>(V)</b> | <b>Φ<sub>b</sub>(V)</b> |
|-------------------------------------------------|---------------------------------------|---------------------------------------|--------------------------|-------------------------|-------------------------|
| <b>p-SiNWs-Ta<sub>2</sub>O<sub>5</sub>-NGQD</b> | 27.72e18                              | 4.19e17                               | -0.78                    | 0.11                    | -0.67                   |
| <b>p-SiNWs-Ta<sub>2</sub>O<sub>5</sub></b>      | 27.72e18                              | 1.8e17                                | -0.29                    | 0.15                    | -0.14                   |
| <b>p-SiNWs-NGQD</b>                             | 27.72e18                              | 6.67e16                               | 0.12                     | 0.1                     | 0.22                    |
| <b>p-SiNWs</b>                                  | 27.72e18                              | 1.06e17                               | 0.07                     | 0.13                    | 0.20                    |

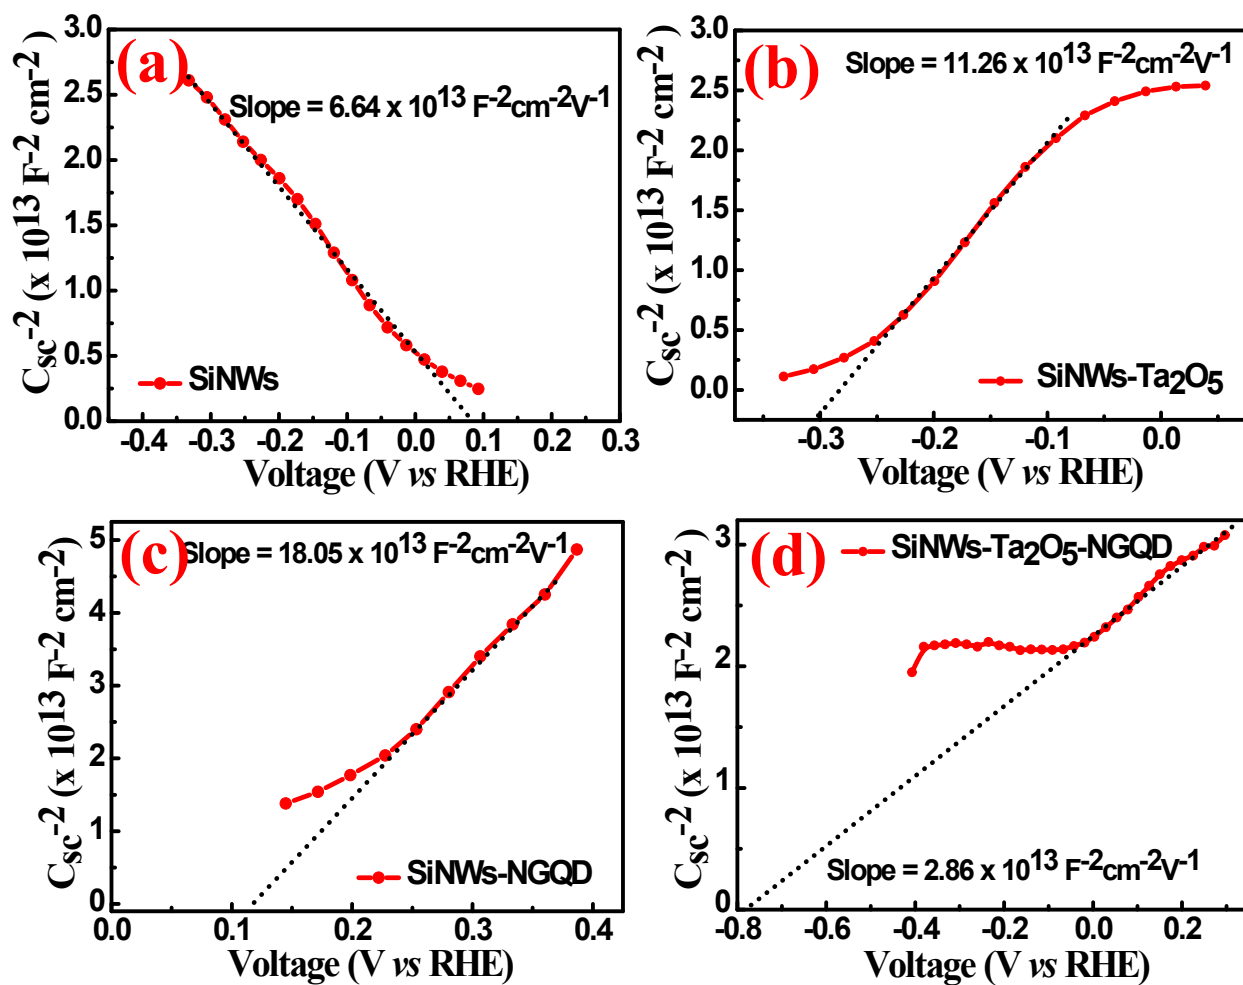

Figure S15. Mott-Schottky result of bare p-SiNWs, p-SiNWs-NGQD and p-SiNWs- Ta<sub>2</sub>O<sub>5</sub> and p-SiNWs- Ta<sub>2</sub>O<sub>5</sub>-NGQD photocathodes.

## References:

- 1 S. Riyajuddin, K. Azmi, M. Pahuja, S. Kumar, T. Maruyama, C. Bera and K. Ghosh, *ACS Nano*, 2021, **15**, 5586–5599.
- 2 Y. Yang, M. Wang, P. Zhang, W. Wang, H. Han and L. Sun, *ACS Appl. Mater. Interfaces*, 2016, **8**, 30143–30151.
- 3 E. L. Warren, J. R. McKone, H. A. Atwater, H. B. Gray and N. S. Lewis, *Energy Environ. Sci.*, 2012, **5**, 9653–9661.
- 4 D. Zhang, Y. Cao, S. K. Karuturi, M. Du, M. Liu, C. Xue, R. Chen, P. Wang, J. Zhang, J. Shi and S. F. Liu, *ACS Appl. Energy Mater.*, 2020, **3**, 4629–4637.
- 5 L. Ji, M. D. McDaniel, S. Wang, A. B. Posadas, X. Li, H. Huang, J. C. Lee, A. A. Demkov, A. J. Bard, J. G. Ekerdt and E. T. Yu, *Nature Nanotech*, 2015, **10**, 84–90.
- 6 T. Wang, S. Liu, H. Li, C. Li, Z. Luo and J. Gong, *Ind. Eng. Chem. Res.*, 2019, **58**, 5510–5515.
- 7 Y. Wan, S. K. Karuturi, C. Samundsett, J. Bullock, M. Hettick, D. Yan, J. Peng, P. R. Narangari, S. Mokkaapati, H. H. Tan, C. Jagadish, A. Javey and A. Cuevas, *ACS Energy Lett.*, 2018, **3**, 125–131.
- 8 G. Paulraj, P. S. Venkatesh, P. Dharmaraj, S. Gopalakrishnan and K. Jeganathan, *International Journal of Hydrogen Energy*, 2020, **45**, 1793–1801.
- 9 G. Huang, J. Mao, R. Fan, Z. Yin, X. Wu, J. Jie, Z. Kang and M. Shen, *Appl. Phys. Lett.*, 2018, **112**, 013902.
- 10 X. Zhang, F. Meng, S. Mao, Q. Ding, M. J. Shearer, M. S. Faber, J. Chen, R. J. Hamers and S. Jin, *Energy Environ. Sci.*, 2015, **8**, 862–868.
- 11 Y. Lin, C. Battaglia, M. Boccard, M. Hettick, Z. Yu, C. Ballif, J. W. Ager and A. Javey, *Nano Lett.*, 2013, **13**, 5615–5618.
- 12 X. Li, Y. Li, H. Wang, H. Miao, H. Zhu, X. Liu, H. Lin and G. Shi, *ACS Appl. Energy Mater.*, 2021, **4**, 730–736.
- 13 S. W. Boettcher, E. L. Warren, M. C. Putnam, E. A. Santori, D. Turner-Evans, M. D. Kelzenberg, M. G. Walter, J. R. McKone, B. S. Brunschwig, H. A. Atwater and N. S. Lewis, *J. Am. Chem. Soc.*, 2011, **133**, 1216–1219.
- 14 M. J. Choi, J.-Y. Jung, M.-J. Park, J.-W. Song, J.-H. Lee and J. H. Bang, *J. Mater. Chem. A*, 2014, **2**, 2928–2933.
- 15 D. V. Esposito, I. Levin, T. P. Moffat and A. A. Talin, *Nat Mater*, 2013, **12**, 562–568.
- 16 R. Fan, W. Dong, L. Fang, F. Zheng and M. Shen, *J. Mater. Chem. A*, 2017, **5**, 18744–18751.
- 17 A. B. Laursen, T. Pedersen, P. Malacrida, B. Seger, O. Hansen, P. C. K. Vesborg and I. Chorkendorff, *Phys. Chem. Chem. Phys.*, 2013, **15**, 20000–20004.
- 18 Y. Sun, C. Liu, D. C. Grauer, J. Yano, J. R. Long, P. Yang and C. J. Chang, *J. Am. Chem. Soc.*, 2013, **135**, 17699–17702.
- 19 I. Oh, J. Kye and S. Hwang, *Nano Lett.*, 2012, **12**, 298–302.
- 20 N. P. Dasgupta, C. Liu, S. Andrews, F. B. Prinz and P. Yang, *J. Am. Chem. Soc.*, 2013, **135**, 12932–12935.
- 21 P. D. Tran, S. S. Pramana, V. S. Kale, M. Nguyen, S. Y. Chiam, S. K. Batabyal, L. H. Wong, J. Barber and J. Loo, *Chemistry – A European Journal*, 2012, **18**, 13994–13999.
- 22 B. Weng, F. Xu and J. Xu, *Nanotechnology*, 2014, **25**, 455402.
- 23 R. R. Devarapalli, C. K. Kamaja and M. V. Shelke, *J. Mater. Chem. A*, 2014, **2**, 13352–13358.
- 24 X. Li, W. Lu, W. Dong, Q. Chen, D. Wu, W. Zhou and L. Chen, *Nanoscale*, 2013, **5**, 5257–5261.
- 25 S. Chandrasekaran, T. Nann and N. H. Voelcker, *Nanomaterials (Basel)*, 2016, **6**, 144.



- 26 G. Yuan, H. Zhao, X. Liu, Z. S. Hasanali, Y. Zou, A. Levine and D. Wang, *Angewandte Chemie*, 2009, **121**, 9860–9864.
- 27 X.-Q. Bao, D. Y. Petrovykh, P. Alpuim, D. G. Stroppa, N. Guldris, H. Fonseca, M. Costa, J. Gaspar, C. Jin and L. Liu, *Nano Energy*, 2015, **16**, 130–142.
- 28 M. Basu, Z.-W. Zhang, C.-J. Chen, P.-T. Chen, K.-C. Yang, C.-G. Ma, C. C. Lin, S.-F. Hu and R.-S. Liu, *Angewandte Chemie International Edition*, 2015, **54**, 6211–6216.
- 29 Z. Huang, Z. Chen, Z. Chen, C. Lv, H. Meng and C. Zhang, *ACS Nano*, 2014, **8**, 8121–8129.
- 30 X.-Q. Bao, M. F. Cerqueira, P. Alpuim and L. Liu, *Chem. Commun.*, 2015, **51**, 10742–10745.
- 31 C. Lv, Z. Chen, Z. Chen, B. Zhang, Y. Qin, Z. Huang and C. Zhang, *J. Mater. Chem. A*, 2015, **3**, 17669–17675.
- 32 C.-J. Chen, K.-C. Yang, M. Basu, T.-H. Lu, Y.-R. Lu, C.-L. Dong, S.-F. Hu and R.-S. Liu, *ACS Appl. Mater. Interfaces*, 2016, **8**, 5400–5407.
- 33 Z. Huang, C. Wang, Z. Chen, H. Meng, C. Lv, Z. Chen, R. Han and C. Zhang, *ACS Appl. Mater. Interfaces*, 2014, **6**, 10408–10414.
- 34 C. G. Morales-Guio, K. Thorwarth, B. Niesen, L. Liardet, J. Patscheider, C. Ballif and X. Hu, *J. Am. Chem. Soc.*, 2015, **137**, 7035–7038.
- 35 S. M. Thalluri, B. Wei, K. Welter, R. Thomas, V. Smirnov, L. Qiao, Z. Wang, F. Finger and L. Liu, *ACS Energy Lett.*, 2019, **4**, 1755–1762.
- 36 U. Sim, J. Moon, J. Lee, J. An, H.-Y. Ahn, D. J. Kim, I. Jo, C. Jeon, S. Han, B. H. Hong and K. T. Nam, *ACS Appl. Mater. Interfaces*, 2017, **9**, 3570–3580.
- 37 U. Sim, J. Moon, J. An, J. H. Kang, S. E. Jerng, J. Moon, S.-P. Cho, B. H. Hong and K. T. Nam, *Energy Environ. Sci.*, 2015, **8**, 1329–1338.
- 38 U. Sim, T.-Y. Yang, J. Moon, J. An, J. Hwang, J.-H. Seo, J. Lee, K. Y. Kim, J. Lee, S. Han, B. H. Hong and K. T. Nam, *Energy Environ. Sci.*, 2013, **6**, 3658–3664.
- 39 Y. Sim, J. John, J. Moon and U. Sim, *Applied Sciences*, 2018, **8**, 2046.
- 40 K. Roy, D. Ghosh, K. Sarkar, P. Devi and P. Kumar, *ACS Appl. Mater. Interfaces*, 2020, **12**, 37218–37226.
- 41 S. Riyajuddin, S. Kumar, D. Badhwar, S. A. Siddiqui, J. Sultana and K. Ghosh, *Sustainable Energy Fuels*, 2021, **5**, 3160–3171.
- 42 I. A. Digdaya, G. W. P. Adhyaksa, B. J. Trzeźniewski, E. C. Garnett and W. A. Smith, *Nat Commun*, 2017, **8**, 15968.
